# Supplementary material
Source: MDPI journal article supplement (https://www.mdpi.com/2311-7524/8/11/987)
Supplement: s1 [file s1]

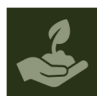

## Article

# Machine Learning Deciphers Genotype and Ammonium as Key Factors for the Micropropagation of *Bryophyllum* sp. Medicinal Plants

Eva Lozano-Milo <sup>1</sup>, Mariana Landin <sup>2</sup>, Pedro Pablo Gallego <sup>1,\*</sup> and Pascual García-Pérez <sup>1,3,\*</sup>

<sup>1</sup> Agrobiotech for Health, Plant Biology and Soil Science Department, Faculty of Biology, Universidade de Vigo, Vigo, Spain

<sup>2</sup> Pharmacology, Pharmacy, and Pharmaceutical Technology Department, I+D Farma (GI-1645), Faculty of Pharmacy, Instituto de Materiales de la Universidade de Santiago de Compostela (iMATUS) and Health Research Institute of Santiago de Compostela (IDIS), Universidade de Santiago de Compostela, Santiago de Compostela, Spain

<sup>3</sup> Sustainable Food Process Department, Università Cattolica del Sacro Cuore, Piacenza, Italy

\* Correspondence: pgallego@uvigo.es (P.P.G.); pasgarcia@uvigo.es (P.G.-P.)

## 1. Supplementary materials

**Citation:** Lozano-Milo, E.; Landin, M.; Gallego, P.P.; García-Pérez, P. Machine Learning Deciphers Genotype and Ammonium as Key Factors for the Micropropagation of *Bryophyllum* sp. Medicinal Plants. *Horticulturae* **2022**, *8*, 987. <https://doi.org/10.3390/horticulturae8110987>

Academic Editors: Yongfeng Zhou and Luigi De Bellis

Received: 2 October 2022

Accepted: 21 October 2022

Published: 25 October 2022

**Publisher's Note:** MDPI stays neutral with regard to jurisdictional claims in published maps and institutional affiliations.

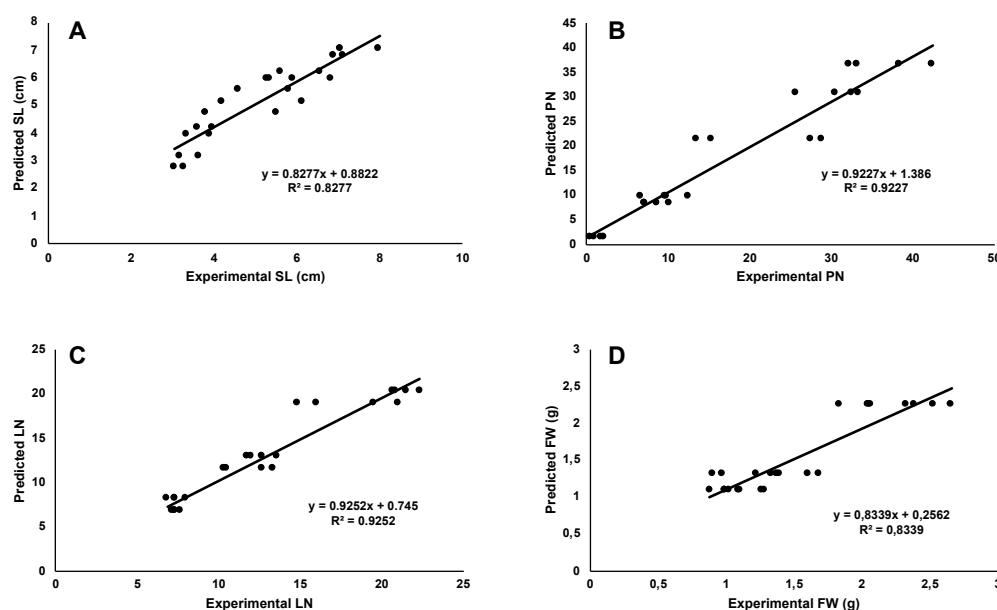

**Figure S1.** Determination coefficients ( $R^2$ ) for experimental vs. predicted values for all outputs, generated by the neurofuzzy logic model. A. SL (cm). B. PN. C. LN. D. FW (g).

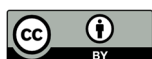

**Copyright:** © 2022 by the authors. Licensee MDPI, Basel, Switzerland. This article is an open access article distributed under the terms and conditions of the Creative Commons Attribution (CC BY) license (<https://creativecommons.org/licenses/by/4.0/>).

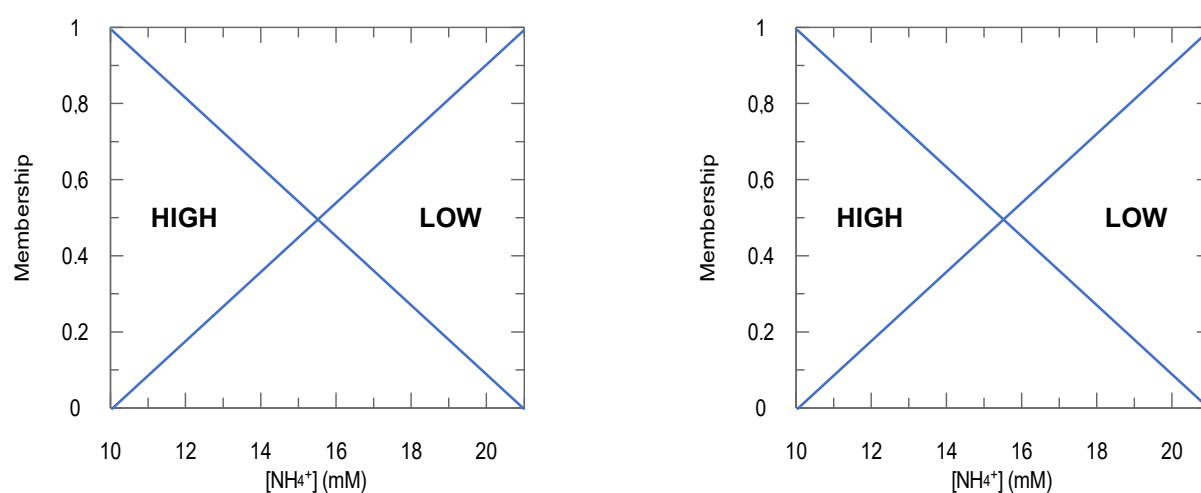

**Figure S2.** Graphical interpretation of the fuzzification process performed by ANN tool for PN (left) and LN (right).

**Table S1.** Salt composition of culture media used in this study.

|                | Salts                                                | MS (mg L <sup>-1</sup> ) | 1/2MS (mg L <sup>-1</sup> ) |
|----------------|------------------------------------------------------|--------------------------|-----------------------------|
| Macronutrients | KNO <sub>3</sub>                                     | 1900                     | 950                         |
|                | NH <sub>4</sub> NO <sub>3</sub>                      | 1650                     | 825                         |
|                | CaCl <sub>2</sub> · 2H <sub>2</sub> O                | 440                      | 220                         |
|                | MgSO <sub>4</sub> · 7H <sub>2</sub> O                | 370                      | 185                         |
|                | KH <sub>2</sub> PO <sub>4</sub>                      | 170                      | 85                          |
| Micronutrients | MnSO <sub>4</sub> · 4H <sub>2</sub> O                | 22.3                     |                             |
|                | ZnSO <sub>4</sub> · 7H <sub>2</sub> O                | 8.6                      |                             |
|                | H <sub>3</sub> BO <sub>3</sub>                       | 6.2                      |                             |
|                | KI                                                   | 0.83                     |                             |
|                | CuSO <sub>4</sub> · 5H <sub>2</sub> O                | 0.025                    |                             |
|                | Na <sub>2</sub> MoO <sub>4</sub> · 2H <sub>2</sub> O | 0.25                     |                             |
|                | CoCl <sub>2</sub> · 6H <sub>2</sub> O                | 0.025                    |                             |
|                | Na <sub>2</sub> EDTA                                 | 37.25                    |                             |
|                | FeSO <sub>4</sub> · 7H <sub>2</sub> O                | 27.85                    |                             |
